# Supplementary material for: Identification of Resistance to Wet Bubble Disease and Genetic Diversity in Wild and Cultivated Strains of Agaricus bisporus
Source: MDPI journal article supplement (doi:10.3390/ijms17101568), 2016-09-22
Supplement: s1 [file s1]

# Supplementary Materials: Identification of Resistance to Wet Bubble Disease and Genetic Diversity in Wild and Cultivated Strains of *Agaricus bisporus*

Yongping Fu, Xinxin Wang, Dan Li, Yuan Liu, Bing Song, Chunlan Zhang, Qi Wang, Meiyuan Chen, Zhiwu Zhang and Yu Li

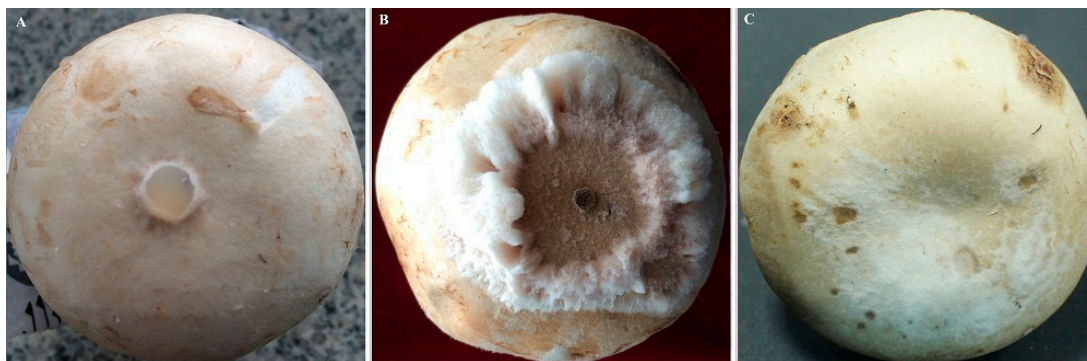

**Figure S1.** Identification results of Koch's postulates. (A) The fruiting bodies were inoculated the mycopathogen on the second day; (B) The fruiting bodies developed visible WBD symptoms 7 days after inoculation of the mycopathogen; (C) The fruiting bodies did not inoculate the mycopathogen after 7 days.

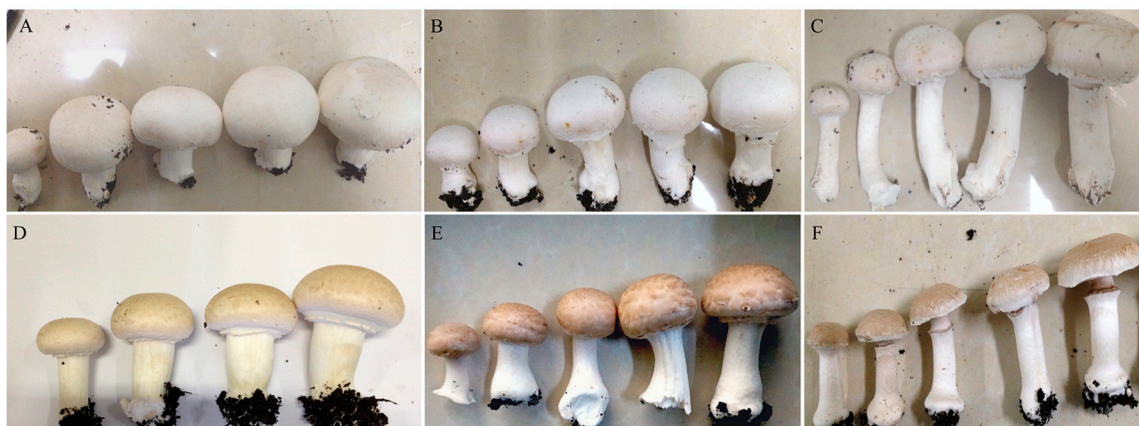

**Figure S2.** The selected *Agaricus bisporus* strains show a high degree of variation according to the morphology. (A–F) The cap colors range from white to brown, caps are smooth to scaly, stems are short to long.
